# Supplementary material for: Oxidative Phosphorylation Is Required for Powering Motility and Development of the Sleeping Sickness Parasite Trypanosoma brucei in the Tsetse Fly Vector
Source: PubMed Central journal article supplement (PMC8749461; doi:10.1128/mbio.02357-21), 2022-01-11
Supplement: mbio.02357-21-sf001.pdf [file mbio.02357-21-sf001.pdf]

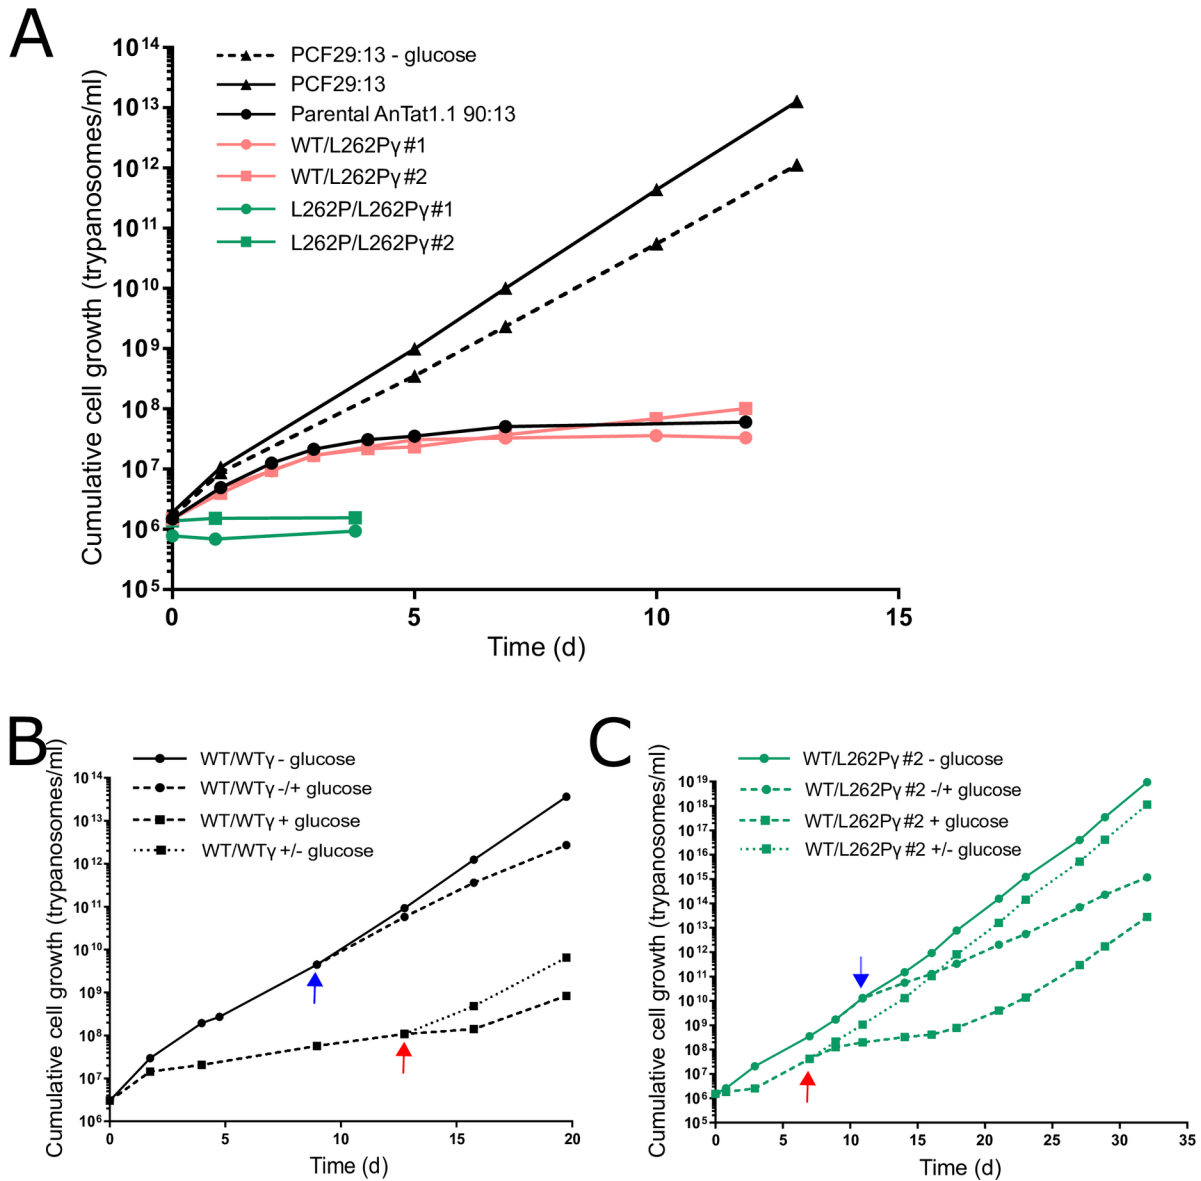

**Fig S1. Effect of glucose on growth rates of freshly differentiated PCF cells.** (A) Cells were treated with 6 mM CA in HMI-9 for 24 h and then transferred to SDM80 medium supplemented with 10 mM glucose (solid lines) at a density of  $2 \times 10^6$ /ml (day 0). An established PCF *T. brucei* cell line, 29:13, was used as control that grows in either SDM80 (residual glucose, dashed lines) or SDM80 supplemented with glucose. Over the next 12-13 days, cells were counted once a day, and afterwards were diluted to a density of at least  $3 \times 10^6$ /ml. (B, C) After induction of differentiation with CA, WT/WT $\gamma$  (B) and WT/L262P $\gamma$  clone #2 parasites (C) were initially grown in either SDM80 (- glucose) or SDM80 supplemented with 10 mM glucose (+ glucose). Red arrows depict transfer of cells from SDM80 with glucose into SDM80 minus glucose (+/- glucose), and blue arrows depict transfer of cells into SDM80 minus glucose into SDM80 with glucose (-/+ glucose).
