# Supplementary material for: Oxidative Phosphorylation Is Required for Powering Motility and Development of the Sleeping Sickness Parasite Trypanosoma brucei in the Tsetse Fly Vector
Source: PubMed Central journal article supplement (PMC8749461; doi:10.1128/mbio.02357-21), 2022-01-11
Supplement: mbio.02357-21-sf002.pdf [file mbio.02357-21-sf002.pdf]

A

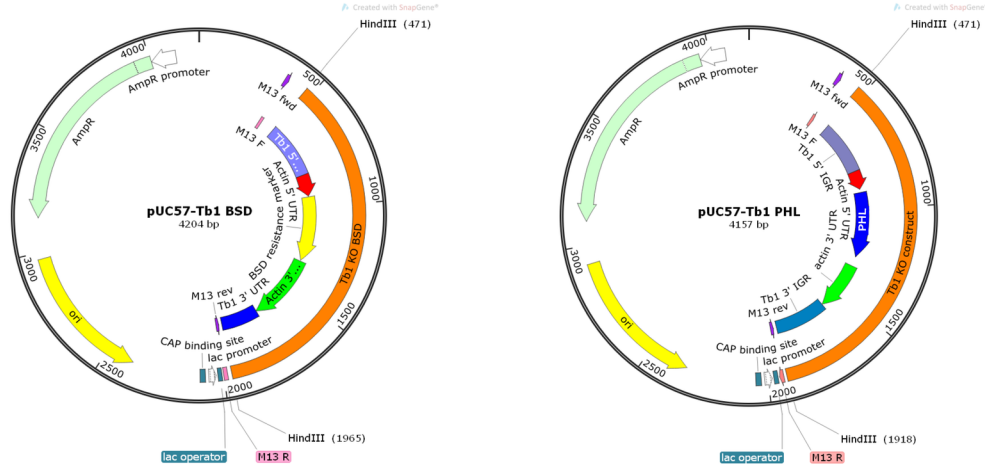

B

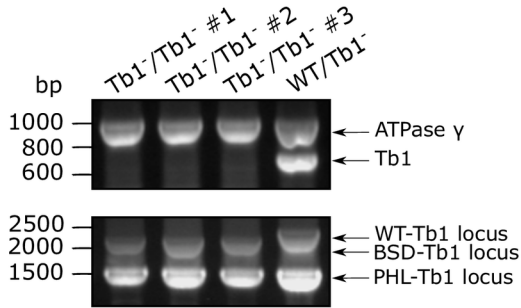

C

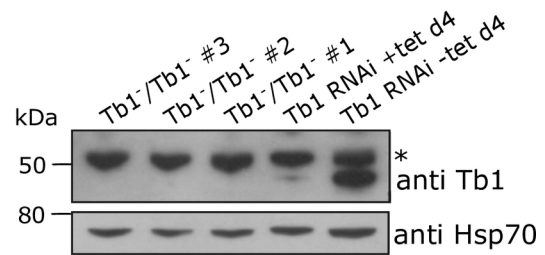

**Fig S2. Generation and verification of *Tb1* null mutants.** (A) *Tb1* knock-out plasmids produced by DNA synthesis (Biomatik). Drug selection markers (BSD, blasticidin resistance; PHL, phleomycin resistance) are flanked by actin 5' and 3' untranslated regions (UTR) for mRNA splicing and polyadenylation, respectively, and by *Tb1* 5' and 3' UTRs or intergenic regions (IGR) for homologous recombination. (B) PCR verification of three *Tb1*<sup>-/-</sup> clones (#1, #2, #3). The top panel shows a duplex PCR with simultaneous amplification of a ~700-bp fragment of the *Tb1* coding sequence and a ~900-bp fragment of the ATPase  $\gamma$  subunit gene as internal control. The bottom panel shows amplification of the *Tb1* locus using primers flanking the 5' and 3' recombination sites. The wild type locus and the locus after replacement of the *Tb1* coding sequence with the BSD and PHL genes give amplicons of 2400 bp, 2100 bp and 1540 bp, respectively. Genomic DNA from a WT/*Tb1*<sup>-</sup> single knock-out cell line is included as a control. (C) Western blot verification of three *Tb1*<sup>-/-</sup> clones, using a *Tb1* antibody and an Hsp70 antibody as control. Whole cell lysates of  $2 \times 10^6$  cells were analysed per lane. The asterisk indicates non-specific detection of a ~55-kDa protein by the *Tb1* antibody. Lysates of an inducible *Tb1* RNAi cell line (Hiero-Yap et al., 2021), uninduced and induced for 4 days for *Tb1* ablation with tetracycline (tet), are shown as a control.
