# Supplementary material for: Oxidative Phosphorylation Is Required for Powering Motility and Development of the Sleeping Sickness Parasite Trypanosoma brucei in the Tsetse Fly Vector
Source: PubMed Central journal article supplement (PMC8749461; doi:10.1128/mbio.02357-21), 2022-01-11
Supplement: mbio.02357-21-sf003.pdf [file mbio.02357-21-sf003.pdf]

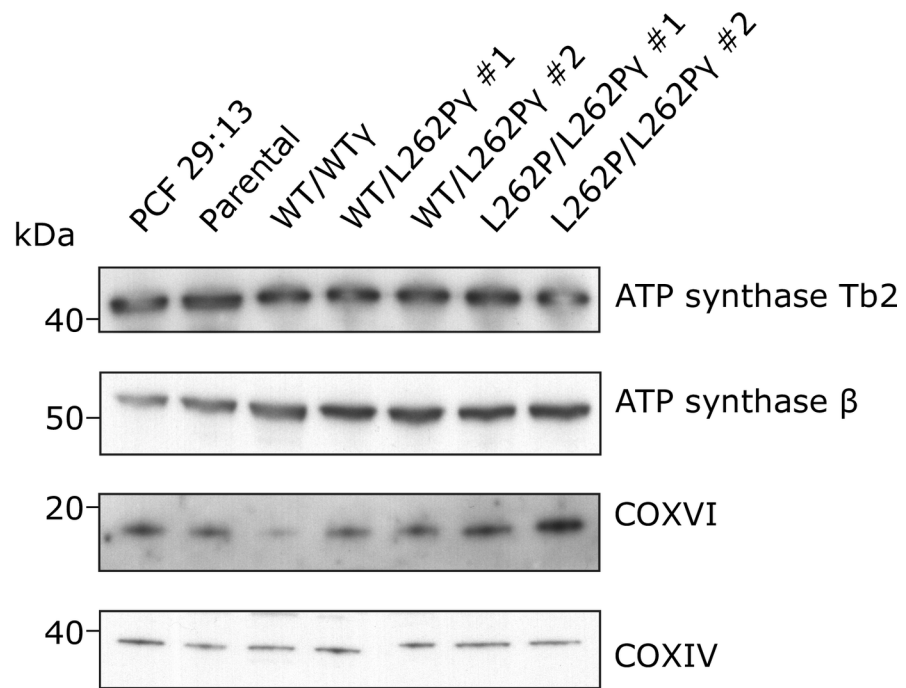

**Fig S3. Abundance of F<sub>1</sub>F<sub>0</sub>-ATP synthase in  $\gamma$  subunit mutants.** Cellular levels of mitochondrial respiratory complexes F<sub>1</sub>F<sub>0</sub>-ATP synthase and cytochrome oxidase (COX) assessed by probing a western blot with specific antibodies. Tb2 and  $\beta$  are subunits of the F<sub>0</sub> and F<sub>1</sub> moieties of the ATP synthase, respectively. COX is represented by subunits IV and VI. Cells were harvested after 48 h in SDM80 medium and whole cell lysates of  $2 \times 10^6$  cells were loaded per lane.
