# Supplementary material for: Oxidative Phosphorylation Is Required for Powering Motility and Development of the Sleeping Sickness Parasite Trypanosoma brucei in the Tsetse Fly Vector
Source: PubMed Central journal article supplement (PMC8749461; doi:10.1128/mbio.02357-21), 2022-01-11
Supplement: mbio.02357-21-sf004.pdf [file mbio.02357-21-sf004.pdf]

## Days after differentiation

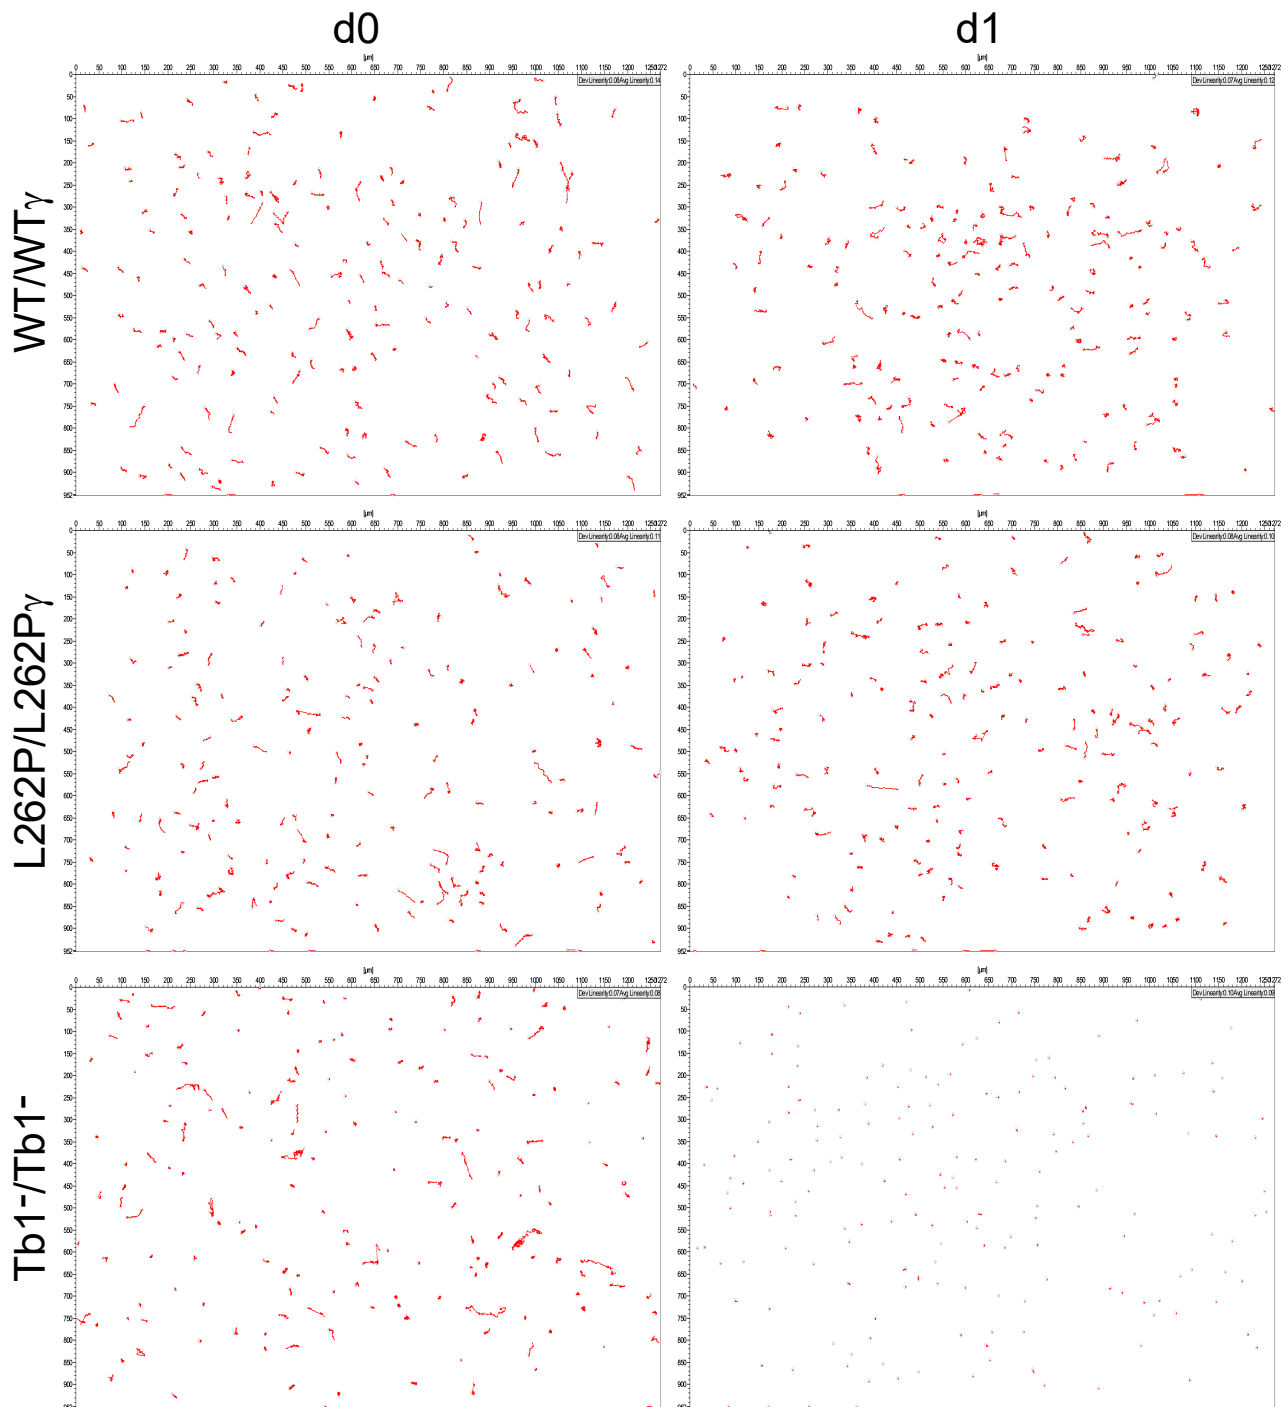

**Fig S4. Motility analysis of *in vitro* cultured cells.** Representative cell movement tracks taken from videos of differentiated PCF cells *in vitro*. Videos were taken of populations of newly differentiated PCF *T. brucei* at days 0 (d0) and 1 (d1) post differentiation, where d0 is defined as the timepoint after 24 h of exposure to 6 mM CA and 27°C and directly after transfer into SDM80 medium.
