# Supplementary material for: Oxidative Phosphorylation Is Required for Powering Motility and Development of the Sleeping Sickness Parasite Trypanosoma brucei in the Tsetse Fly Vector
Source: PubMed Central journal article supplement (PMC8749461; doi:10.1128/mbio.02357-21), 2022-01-11
Supplement: mbio.02357-21-st001.pdf [file mbio.02357-21-st001.pdf]

**Table S1. Cell lines used in this study.**

| Cell line                  | Derived from:             | Genotype                                                                              | Description                                                                                                                         |
|----------------------------|---------------------------|---------------------------------------------------------------------------------------|-------------------------------------------------------------------------------------------------------------------------------------|
| Parental                   | -                         | -                                                                                     | EATRO 1125AnTat 1.1 90:13                                                                                                           |
| WT/WT $\gamma$             | EATRO 1125AnTat 1.1 90:13 | ATP $\gamma$ / $\Delta$ atpy::atpyWT +PURO                                            | One F1FO-ATP synthase subunit $\gamma$ allele replaced with a WT copy and the puromycin resistance gene (PURO)                      |
| WT/L262P $\gamma$ #1       | EATRO 1125AnTat 1.1 90:13 | ATP $\gamma$ / $\Delta$ atpy::atpyL262P +PURO                                         | One F1FO-ATP synthase subunit $\gamma$ allele replaced with a copy with the L262P mutation and the puromycin resistance gene (PURO) |
| WT/L262P $\gamma$ #2       | EATRO 1125AnTat 1.1 90:13 | ATP $\gamma$ / $\Delta$ atpy::atpyL262P +PURO                                         | One F1FO-ATP synthase subunit $\gamma$ allele replaced with a copy with the L262P mutation and the puromycin resistance gene (PURO) |
| L262P/L262P $\gamma$ #1    | WT/L262P #3               | $\Delta$ atpy::atpyL262P +BSD/ $\Delta$ atpy::atpyL262P +PURO                         | One F1FO-ATP synthase subunit $\gamma$ allele replaced with a copy with the L262P mutation and the puromycin resistance gene (BSD)  |
| L262P/L262P $\gamma$ #2    | WT/L262P #3               | $\Delta$ atpy::atpyL262P +BSD/ $\Delta$ atpy::atpyL262P +PURO                         | One F1FO-ATP synthase subunit $\gamma$ allele replaced with a copy with the L262P mutation and the puromycin resistance gene (BSD)  |
| L262P/WT $\gamma$          | L262P/L262P #2            | $\Delta$ atpy::atpyL262P +BSD/ $\Delta$ atpyL262p::atpyWT +PHL                        | One F1FO-ATP synthase subunit L262P $\gamma$ allele replaced with a WT copy with the puromycin resistance gene (PHL)                |
| WT/L262P $\gamma$ kDNA0 #1 | WT/L262P #1               | ATP $\gamma$ / $\Delta$ atpy::atpyL262P +PURO                                         | Cell line WT/L262P $\gamma$ #1 induced to lose kDNA through exposure to acriflavine                                                 |
| WT/L262P $\gamma$ kDNA0 #2 | WT/L262P #2               | ATP $\gamma$ / $\Delta$ atpy::atpyL262P +PURO                                         | Cell line WT/L262P $\gamma$ #2 induced to lose kDNA through exposure to acriflavine                                                 |
| Tb1-/Tb1- #1               | WT/L262P #1               | ATP $\gamma$ / $\Delta$ atpy::atpyL262P +PURO<br>$\Delta$ tb1::BSD/ $\Delta$ tb1::PHL | Cell line WT/L262P $\gamma$ #1 with BSD and PHL resistance genes present in Tb1 loci                                                |
| Tb1-/Tb1- #2               | WT/L262P #1               | ATP $\gamma$ / $\Delta$ atpy::atpyL262P +PURO<br>$\Delta$ tb1::BSD/ $\Delta$ tb1::PHL | Cell line WT/L262P $\gamma$ #1 with BSD and PHL resistance genes present in Tb1 loci                                                |
| Tb1-/Tb1- #3               | WT/L262P #1               | ATP $\gamma$ / $\Delta$ atpy::atpyL262P +PURO<br>$\Delta$ tb1::BSD/ $\Delta$ tb1::PHL | Cell line WT/L262P $\gamma$ #1 with BSD and PHL resistance genes present in Tb1 loci                                                |
