# Supplementary material for: Oxidative Phosphorylation Is Required for Powering Motility and Development of the Sleeping Sickness Parasite Trypanosoma brucei in the Tsetse Fly Vector
Source: PubMed Central journal article supplement (PMC8749461; doi:10.1128/mbio.02357-21), 2022-01-11
Supplement: mbio.02357-21-st002.pdf [file mbio.02357-21-st002.pdf]

**Table S2. Statistical analysis by one-way ANOVA of selected data from Fig 2A.**

**Succinate**

|                                          | <b>WT/WT<math>\gamma</math></b> | <b>WT/L262P<math>\gamma</math> #2</b> | <b>L262P/L262P<math>\gamma</math> #1</b> | <b>L262P/L262P<math>\gamma</math> #2</b> | <b>L262P/WT<math>\gamma</math></b> |
|------------------------------------------|---------------------------------|---------------------------------------|------------------------------------------|------------------------------------------|------------------------------------|
| <b>WT/WT<math>\gamma</math></b>          |                                 | 0.0072                                | <b>&lt;0.0001</b>                        | <b>&lt;0.0001</b>                        | 0.2216                             |
| <b>WT/L262P<math>\gamma</math> #2</b>    |                                 |                                       | <b>&lt;0.0001</b>                        | <b>&lt;0.0001</b>                        | 0.0001                             |
| <b>L262P/L262P<math>\gamma</math> #1</b> |                                 |                                       |                                          | 0.3673                                   | <b>&lt;0.0001</b>                  |
| <b>L262P/L262P<math>\gamma</math> #2</b> |                                 |                                       |                                          |                                          | <b>&lt;0.0001</b>                  |

**Succinate + pyruvate**

|                                          | <b>WT/WT<math>\gamma</math></b> | <b>WT/L262P<math>\gamma</math> #2</b> | <b>L262P/L262P<math>\gamma</math> #1</b> | <b>L262P/L262P<math>\gamma</math> #2</b> | <b>L262P/WT<math>\gamma</math></b> |
|------------------------------------------|---------------------------------|---------------------------------------|------------------------------------------|------------------------------------------|------------------------------------|
| <b>WT/WT<math>\gamma</math></b>          |                                 | 0.0005                                | <b>&lt;0.0001</b>                        | <b>0.0429</b>                            | 0.0127                             |
| <b>WT/L262P<math>\gamma</math> #2</b>    |                                 |                                       | <b>&lt;0.0001</b>                        | <b>&lt;0.0001</b>                        | 0.6589                             |
| <b>L262P/L262P<math>\gamma</math> #1</b> |                                 |                                       |                                          | 0.1465                                   | <b>&lt;0.0001</b>                  |
| <b>L262P/L262P<math>\gamma</math> #2</b> |                                 |                                       |                                          |                                          | <b>0.0001</b>                      |

**Notes:**

P-values in bold are indicated in Fig 2A or are referred to in the text

|                                            |                                    |               |
|--------------------------------------------|------------------------------------|---------------|
|                                            | <b>L262P/L262Py #1 + succinate</b> |               |
| <b>L262P/L262Py #1 + succinate + azide</b> |                                    | <b>0.2017</b> |
| <b>L262P/L262Py #2 + succinate + azide</b> |                                    | 0.9605        |

|                                               |                                    |               |
|-----------------------------------------------|------------------------------------|---------------|
|                                               | <b>L262P/L262Py #1 + succinate</b> |               |
| <b>L262P/L262Py #1 + succinate + pyruvate</b> |                                    | <b>0.8543</b> |
| <b>L262P/L262Py #2 + succinate + pyruvate</b> |                                    | 0.0081        |
| <b>L262P/WTy + succinate + pyruvate</b>       |                                    | <0.0001       |

L262P/L262Pγ #2 + succinate  
0.0019  
**0.3733**

| L262P/L262Pγ #2 + succinate | L262P/WTy + succinate |
|-----------------------------|-----------------------|
| >0.9999                     | <0.0001               |
| <b>0.159</b>                | 0.0162                |
| 0.1787                      | <b>0.4167</b>         |
